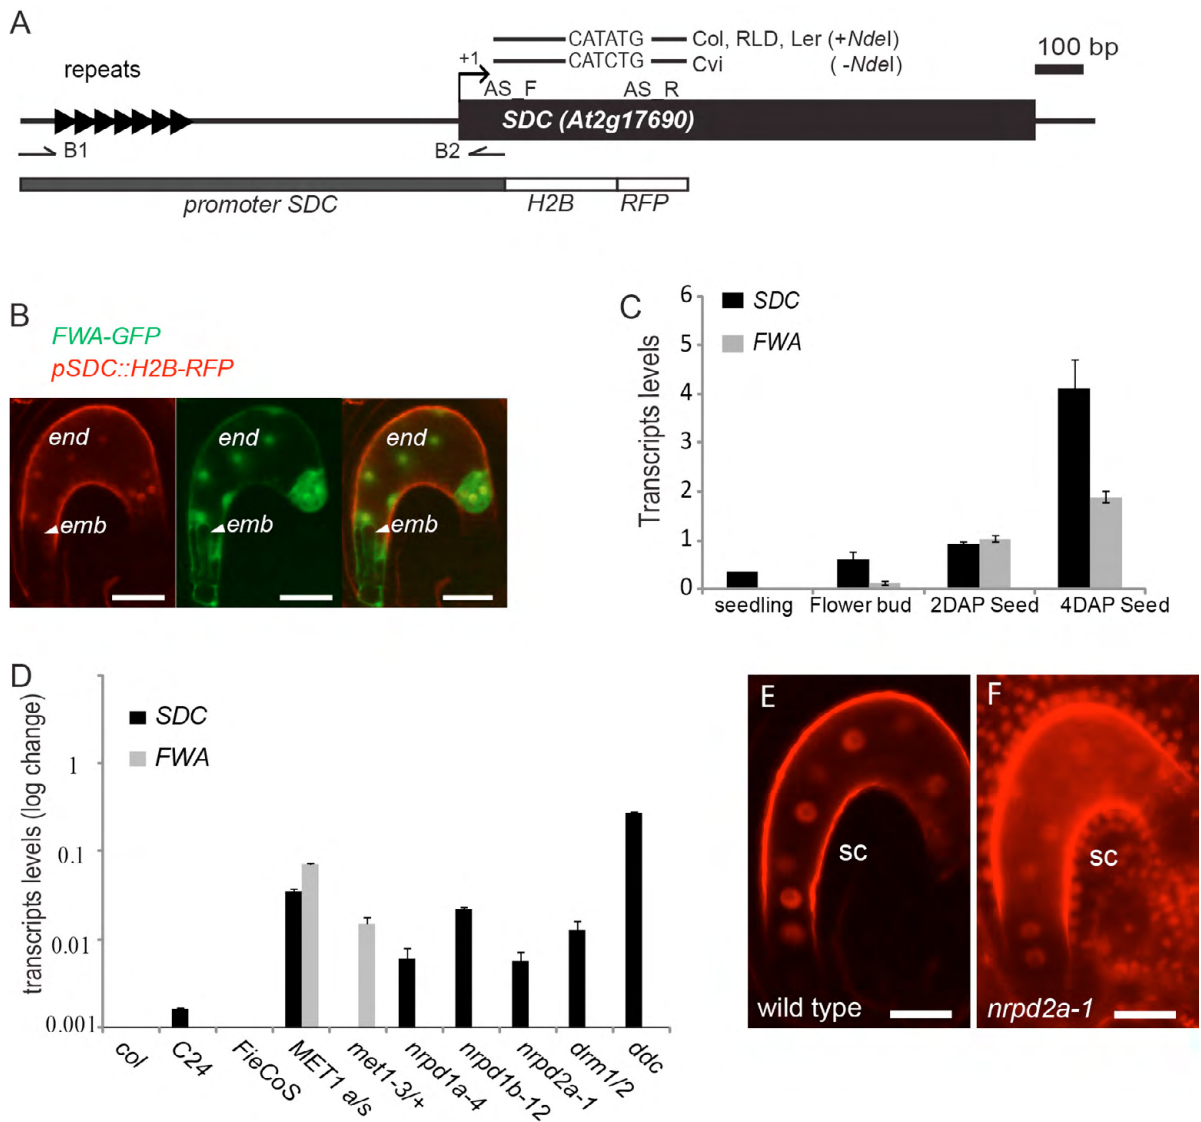

**Fig. S1. *SDC* is expressed in endosperm specifically and silenced in vegetative tissues by RdDM.** This figure relates to Fig. 2. (A) The *SDC* locus indicating sites of polymorphisms and primers. Seven black arrowheads indicate the tandem repeats. The polymorphism introduces a recognition site for *NdeI* in Col, RLD and *Ler* but not in Cvi. (B) Confocal analysis of *pSDC::H2B-RFP* with the marker for endosperm (end) *pFWA-GFP*, which also provides outlines of the embryo (emb). Scale bars: 50  $\mu$ m. (C) qRT-PCR analysis of parental expression of *SDC* and *FWA* in seeds at different developmental stages. (D) qRT-PCR analysis of *SDC* expression in somatic tissues in different mutants for Polycomb group genes (FieCoS), maintenance DNA methylation genes (MET1 antisense MET1 a/s and *met1-3/+*) and RdDM pathway genes (*nrpd1a-4*, *nrpd1b-12*, *nrpd2a-1* and *drm1,drm2* double mutant), and in the triple mutant *ddc* (*drm1-2, drm2-2, cmt3-11t*). RNA was extracted from 10-day-old seedlings. The y-axis is displayed in log scale. (E, F) Confocal section of a developing seed at 1 DAP expressing the *pSDC::H2B-RFP* construct in wild-type and the *nrpd2a-1* backgrounds. sc, seed coat. Scale bars: 50  $\mu$ m

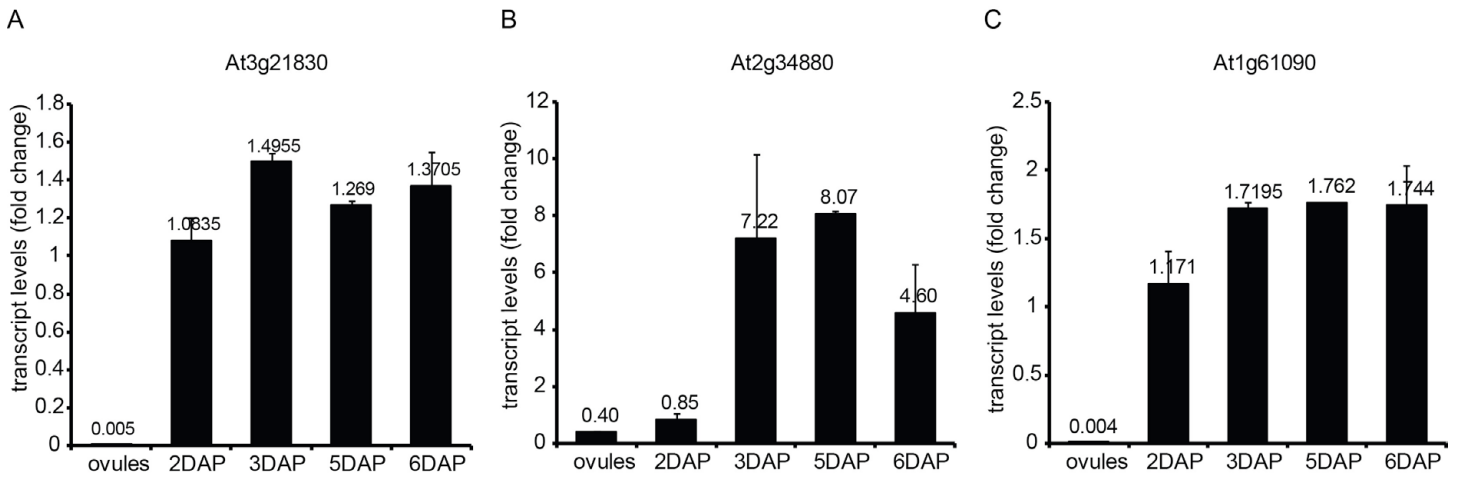

**Fig. S2. Expression pattern of candidate imprinted genes during seed development.** This figure relates to Fig. 3. Real-time PCR analysis of expression pattern of (A) At3g21830, (B) At2g34880 and (C) At1g61090 in ovule before fertilization and in seeds collected at different stages of development. The qPCR results were normalized with *UBQ10* expression levels in 2 DAP seeds. Three technical replicates and two biological replicates were performed; the y-axis is linear and the levels of expression are reported above each column. We observed a 200-fold increase of transcripts levels in 2 DAP seeds compared with unfertilized ovules for At3g21830 and At1g61090. Transcript levels of At2g34880 were multiplied by five from ovules to 2 DAP seeds and increased more than 20 times in 3 DAP seeds compared with ovules.

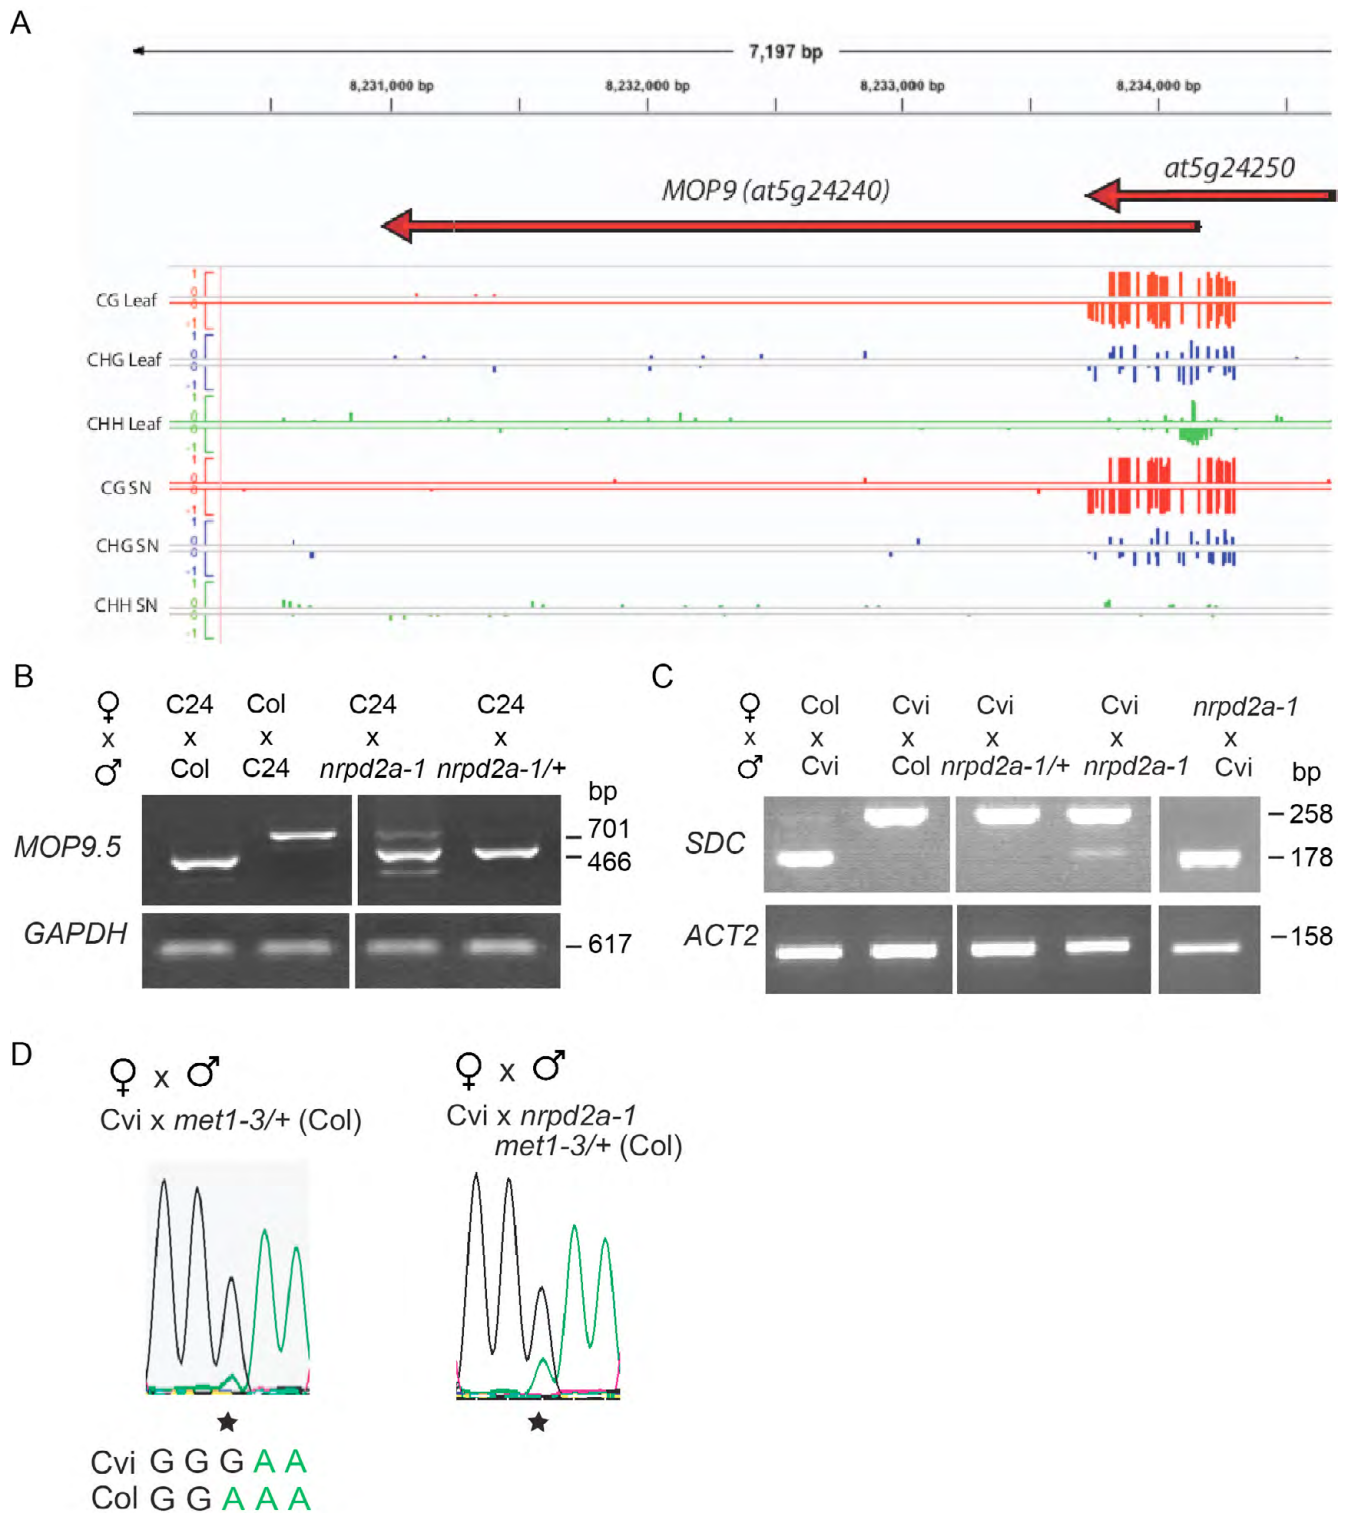

**Fig. S3. Regulation of paternal expression of imprinted genes.** This figure relates to Fig. 4. (A) DNA methylation analysis of the *MOP9.5* locus in leaf and sperm cells (SN). (B) Allele-specific RT-PCR analysis of *MOP9.5* in seeds produced by crosses between wild-type mother and *nrpd2a-1* homozygous and *nrpd2a-1/+* fathers (Col background). GAPDH is used as loading control. (C) Allele-specific RT-PCR analysis of *SDC* in seeds produced by crosses between wild-type mother and *nrpd2a-1* homozygous and *nrpd2a-1/+* fathers (Col background). ACT2 is used as loading control. (D) Allele-specific RT-PCR analysis of *SDC* expression in the seeds produced by the reciprocal crosses between Cvi wild-type ovules and pollen from *met1-3/+* and double mutant *nrpd2a-1, met1-3/+* (Col background). We used RT-PCR sequencing chromatographs at selected SNP present in different accessions.

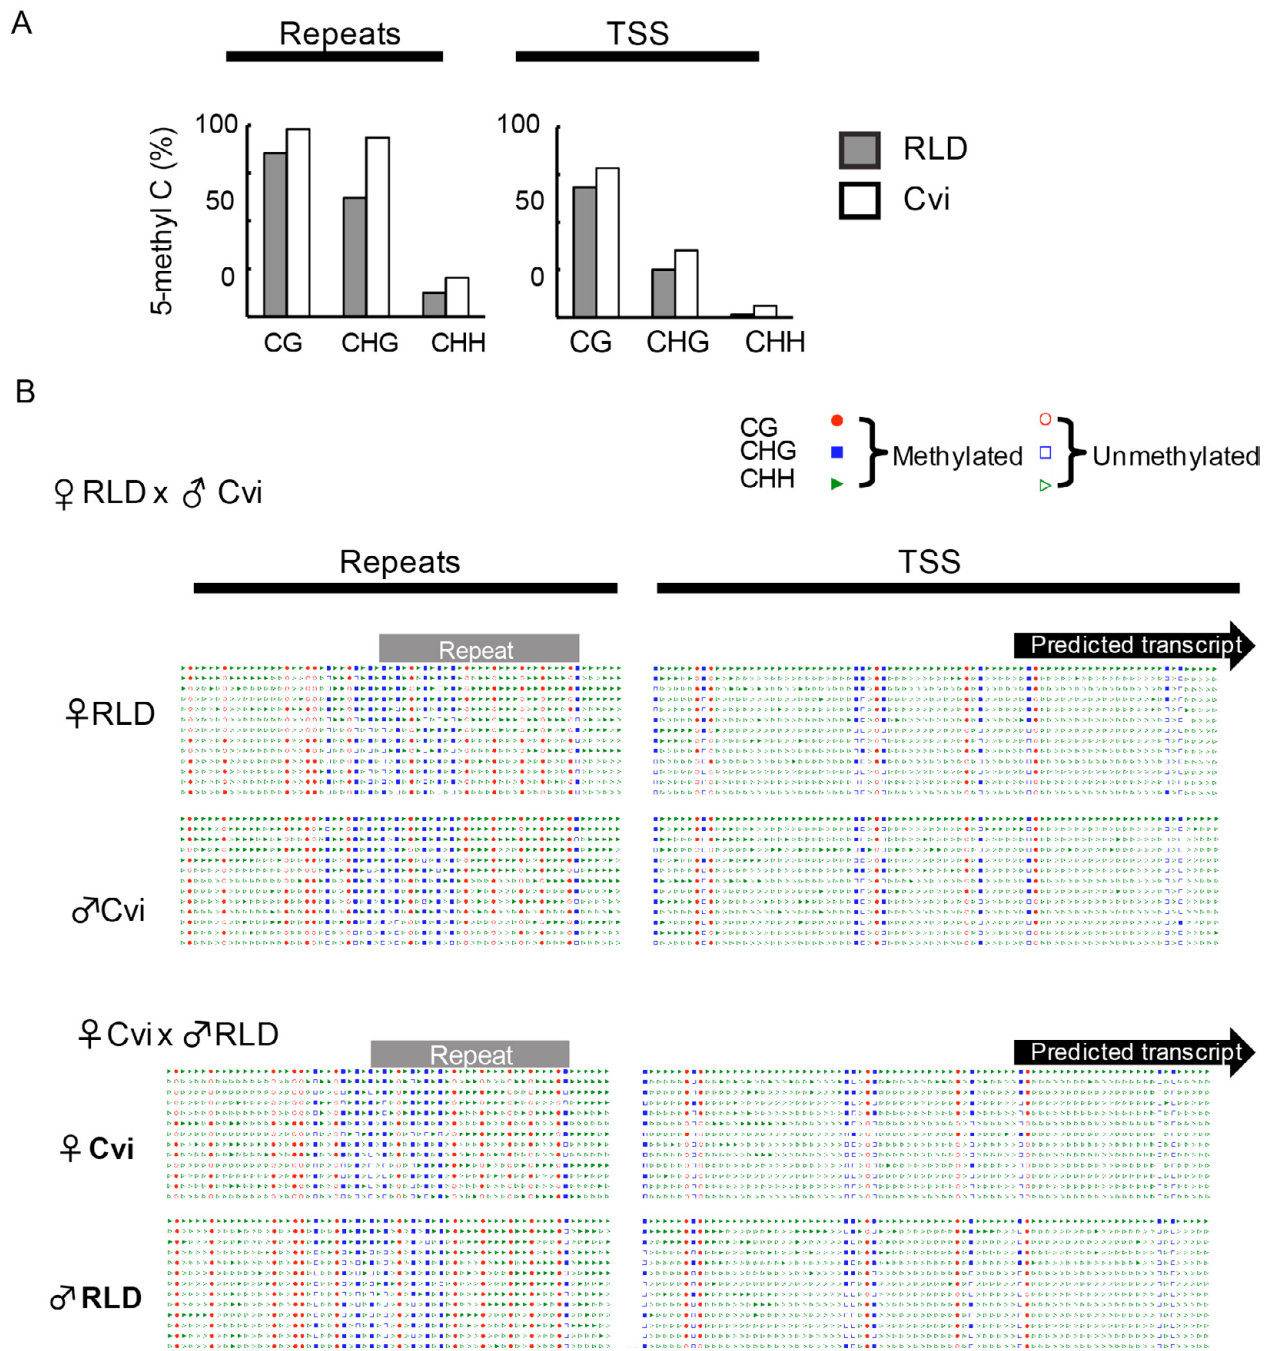

**Fig. S4. Maternal control of *SDC* expression.** This figure relates to Fig. 6. (A) Percent methylation at CG, CHG and CHH sites on the 32 bp repeat region and TSS region of *SDC* in leaves. DNA was extracted from leaves. (B) Cytosine methylation patterns of the 32 bp repeat region and TSS are visualized graphically using CyMATE software. The data sets are same as in Fig. 6B. Each line represents the methylation pattern of an individual clone. First lines of all blocks are reference sequences. Empty symbols represent converted (unmethylated) cytosine residues. Filled symbols represent unconverted (methylated) cytosine residues. Red circles, blue squares and green triangles represent each 5-methylcytosine in CG, CHG and CHH contexts, respectively.

```

RLD      AAATTTGTGCAAATTTTACCCTTGGGACTAAAGCGGACAATATCATACTACAATTGGAA 60
Cvi      AAATTTGTGCAAATTTTACCCTTGGTACTAAAGCGGACAATATCATACT--AATTGGAA 58
*****

RLD      GAGTTGGAATGGGCTTCGAGAGCCCAACAACCTTTTTTCTTAGAAAACAATAAATTATTT 120
Cvi      GAGTTGGAATGGGCTTCGAGAGCCCAACAACCTTTTTTCTTAGAAAACAATAAATTATTT 118
*****

RLD      GCAAAACGCATGAAAATCATCGTACGAAATATTCAGATATCTGATGAATTATTTGGTT 180
Cvi      GCAAAACGCATGAAAATCATCGTACGAAATATTCAGATATCTGATGAATTATTTGGTT 178
*****

RLD      ATTACCACGTCAGTAGTTATAAAGATAAGATTACACAGTACAAGTCAGTTATAAAGATAA 240
Cvi      ATTACCACGTCAGTAGTTATAAAGATAAGATTACACAGTACAAGTCAGTTATAAAGATAA 238
*****

RLD      GATTTACAGTACAGCTTAGCTATTTAGATAAGATTTACAGTACAGCTCAGTTATAAAG 300
Cvi      GATTTACAGTACAGCTTAGCTATTTAGATAAGATTTACAGTACAGCTCAGTTATAAAG 298
*****

RLD      ATTAGATTTACAGTACAGCTAGTTATAAAGATTAGATTTACAATACAGCTCAGTTAT 360
Cvi      ATTAGATTTACAGTACAGCTAGTTATAAAGATTAGATTTACAATACAGCTCAGTTAT 358
*****

RLD      AAAGATAAGATTTACAATACAGCTTAGTTATAAAGATAAGATTTTCATAGTACAGTTAG 420
Cvi      AAAGATAAGATTTACAATACAGCTTAGTTATAAAGATAAGATTTTCATAGTACAGTTAG 418
*****

RLD      TTATAAAGATAAGATTTACAATACAGCTCAGCCCTAACCAAAACATATTAGGTTTGGAT 480
Cvi      TTATAAAGATAAGATTTACAATACAGCTCAGCCCTAACCAAAACATATTAGGTTTGGAT 478
*****

RLD      GTGTACCTATAAGTAGAGAGGTTTAAAGCAGAAAGAGCAAAACAAAAAATCTTAGAGAC 540
Cvi      GTGTACCTATAAGTAGAGAGGTTTAAAGCAGAAAGAGCAAAACAAAAAATCTTAGAGAC 538
*****

RLD      TCACGCCGCTTAGAAGAGTTCCAACATTTCAAGAGATCTCTAAGATTTGGCAATCCAAC 600
Cvi      TCACGCCGCTTAGAAGAGTTCCAACATTTCAAGAGATCTCTAAGATTTGGCAATCCAAC 598
*****

RLD      ATCATTAGAATCTAAACAACACAAAATACTTTTTCTTACCAATCTGTAAACTGTCTCGA 660
Cvi      ACCATTAGAACCTAAACAACACAAAATACTTTTTCTTACCAATCTGTAAACTGTCTCGA 658
* *****

RLD      TCAGAAAC-GTTAAAATTTACTCAAACACCATCAAATCCCAATTATTTTTTTT-CAACATC 718
Cvi      TCAGAAACAGTTAAAATTTACTCAAACACCATCAAATCCCAATTATTTTTTTTCAACATC 718
*****

RLD      ATAAACTGCGGTTCCAGACATATCCTCCGACCAAAATCTACCGATATAAATGTAATCTA 778
Cvi      ATAAATGCGGTTCCAGACATATCCTCCAACCAAAATCTACCGATATAAATGTAATCTA 778
*****

RLD      GCATAAAACAATTTCTCTTTGTAGTTACTTAATTTTTATATCATAATTAATATTTTAC 838
Cvi      GCATAAAATAAATTTCTCTTTGTAGTTACTTAATTTTTATATCATAATTAAGATTTTAC 838
*****

RLD      CAAAACAGTTTGGTTTTCAATGATATTCATTAGATCACCTTACAATTTATTCATTTT 898
Cvi      CAAAACAGTTTGGTTTTCAATGATGTCAATTAGATCACCTTACAATTTATTCATTTT 898
*****

RLD      CATTATATATTTTTTAGTCAGCAAACCTGATTGAGCTTTTTCTCAACTCTTTAAGGTTTGA 958
Cvi      CATTATATATTTTTTAGTCAGCAAACCTGATTGAGCTTTTTCTCAACTCTTTAAGGTTTGA 958
*****

RLD      AAGGAAGTAAAGTTGA 974
Cvi      AAGGAAGTAAAGTTGA 974
*****

```

Fig. S5. Alignment between RLD and Cvi of the *SDC* promoter and 5' UTR region, which were analyzed with bisulfite sequencing. Blue letters and red letters indicate repeats and the predicted *SDC* transcript, respectively. The sequence alignment was performed with ClustalW.

**Table S1. Lists of primers used in this study**

Primers for RT-PCR and RT-qPCR

| Target                                | Primers      | Sequences (5'-3')                          |
|---------------------------------------|--------------|--------------------------------------------|
| <i>NRPD2a</i>                         | NRPD2a-RTf   | AACGGTAGATCAGGTGAGATGATGCG                 |
|                                       | NRPD2a-RTr   | CGGAACATAGACCCTAACCCACATGGTC               |
|                                       | NRPD2a-qF    | AAAGTTTGGAGTCTGTGGTG                       |
|                                       | NRPD2a-qR    | TTGATTTCCATCTCACGAGGT                      |
| <i>FWA</i>                            | FWA-RTf      | GTGACTCTGGTCAAGACT                         |
|                                       | FWA-RTr      | TTGGTTCCACCAGAACCGGTA                      |
| <i>FWA(qPCR)</i>                      | FWA-qF       | CTCTGGTCAAGACTCTTATGG                      |
|                                       | FWA-qR       | ATTCTGCTTGAATCTGTTG                        |
| <i>MOP9.5</i><br>( <i>At5g24240</i> ) | At5g24240-qF | GTGCTTACTCCAATAGACCA                       |
|                                       | At5g24240-qR | CATGGTTGAAATACGGAGGA                       |
| <i>SDC</i>                            | SDC-rtF      | AATGTAAGTTGTAAACCATTTGAACGTGACC            |
|                                       | SDC-rtR      | CAGGCATCCGTAGAACTCATGAGC                   |
| <i>SDC (qPCR)</i>                     | SDC-qF       | TAGTCAGCAAACCTGATTGAGC                     |
|                                       | SDC-qR       | AAGGTTTGTAAAGATGTCGTGG                     |
| <i>UBQ10</i>                          | UBQ10-F      | TTCTCTCAATTCTCTCTACCGT                     |
|                                       | UBQ10-R      | TGGCCTTAACGTTGTCGAT                        |
| <i>ACT2</i>                           | Act2-RT1     | CTCAGGTATCGCTGACCGTATGAG                   |
|                                       | Act2-RT2     | CTTGGAGATCCACATCTGCTGGAATG                 |
| <i>GAPDH</i>                          | GAPDH5'      | AGGGTGGTGCCAAGAAGGTTG                      |
|                                       | GAPDH3'      | GTAGCCCCACTCGTTGTCGTA                      |
| <i>ACT11</i><br>( <i>qPCR</i> )       | Act11-qF     | GAGATGATGCACCAAGAGCTGTA                    |
|                                       | Act11-qR     | CATACCAACCATGACACCAGTGT                    |
| <i>RPS5A</i>                          | AtRPS5A F    | CTCTCATTCGCGCGACGCAAACG                    |
|                                       | AtRPS5A R    | GGGTTCAAGTCAGACAAGAGGTGG                   |
| <i>DD31</i>                           | DD31 +0F     | ATGACAAAATCTCTACTCATGGTAAC                 |
|                                       | DD31 +496R   | CAATCTTGCTCCCTACTCTAAAG                    |
| <i>DD65</i>                           | DD65 +0F     | ATGAAGTGTTTGTGTTTTGTCGTG                   |
|                                       | DD65 +344R   | GCAAATCCAAACCCTGAAAAG                      |
| <i>DD45</i>                           | DD45 For     | ATGGCTTCTAACACAAGTTTCCTCTTTGC              |
|                                       | DD45 Rev     | TCAAAGTTTCACAGAGGAAGGCGCCGGAGAAGAACC<br>CC |

|                              |                              |                                                      |
|------------------------------|------------------------------|------------------------------------------------------|
| <i>NRPD1a</i>                | NRPD1a-rtF<br>NRPD1a-rtR     | TAGCTGATAGTCTCTCTGTTACGGG<br>GGAGAATGCGTTTCAATGACTGG |
| <i>NRPD1b</i>                | NRPD1b-rtF<br>NRPD1b-rtR     | ATGATGACAAGACGTTTGTCTGG<br>GCCTGAGCCTGAGATGGAGACTGA  |
| At2g34880<br>( <i>qPCR</i> ) | At2g34880-qF<br>At2g34880-qR | CCACTCTTCAAGGTTACTTTGG<br>CTCTTCCTTAACTCTAAGCAACAC   |
| At1g61090<br>( <i>qPCR</i> ) | At1g61090-qF<br>At1g61090-qR | AAACTGCTACACTGAGAAGGA<br>TAAGGAACACAATACCCACTCT      |
| At3g21830<br>( <i>qPCR</i> ) | At3g21830-qF<br>At3g21830-qR | CACGATCTTTGCTCTCACCA<br>AATCGCTGCTTCTTCCTCAG         |

Primers for cloning

| Target     | Primers | Sequences (5'-3')                                                     |
|------------|---------|-----------------------------------------------------------------------|
| <i>SDC</i> | SDC-B1  | <u>GGGGACAAGTTTGTACAAAAAAGCAGGCTTTCCACA</u><br><u>AGACCACA</u> ACTCC* |
|            | SDC-B2  | GGGACCACTTTGTACAAGAAAGCTGGGTCCGGCTTG<br><u>AAGTAGATGAGAGG</u> *       |

\*Nucleotide sequences specific to the targets are underlined.

Primers for genotyping

| Target        | Primers                                       | Sequences (5'-3')                                |
|---------------|-----------------------------------------------|--------------------------------------------------|
| <i>NRPD1a</i> | Nrpd1a-4 LP<br>Nrpd1a-4 RP                    | TGGGTTTGCCATTTTCATATC<br>CCACAAACTCTCCCGTAACAG   |
|               | <i>NRPD1a</i><br>Nrpd1b-12 LP<br>Nrpd1b-12 RP | AGGCACCAAGAAAATGTTTTG<br>TTATTTTTGTCCCTGGAACCC   |
| <i>NRPD2a</i> | Nrpd2a-1 LP<br>Nrpd2a-1 RP                    | CATTGTCTCTTGGTTTTAGCTCG<br>TCATCAGTGGCTCGGTTTTAC |
|               | <i>SDC</i><br>S_017593-LP<br>S_017593-LP      | TCATAAACTGCGTTCCAGAC<br>CGTTCCATATTCCTCCTTTCC    |
| <i>mop9.5</i> | 508H08_LP<br>508H08_RP                        | TCCTATGACTGGACCACGAAC<br>AATTTGCTGCAGGTTTTGATG   |
|               | <i>mop9.5</i><br>462F03_LP<br>462F03_RP       | AGCTCATGGGATTCATCAATG<br>TTGGAAGTTGCGAAGATATGG   |

Primers for genomic bisulfite sequencing

| Target                    | Primers | Sequences (5'-3')           |
|---------------------------|---------|-----------------------------|
| <i>SDC</i> -repeat region | Forward | CCACAAACTCTCCCGTAACAG       |
|                           | Reverse | TACTTATArrTACACATCAAACCCTA  |
| <i>SDC</i> TSS region     | Forward | TAGGGTTTGATGTGTAAyyTATAAGTA |
|                           | Reverse | TAGGGTTTGATGTGTAAyyTATAAGTA |

Primers for allele specific RT-PCR

| Target        | Primers       | Sequences (5'-3')                      | Enzyme                          |
|---------------|---------------|----------------------------------------|---------------------------------|
| <i>FWA</i>    | FWA-Rtf2      | GATCCAAAGGAGTATCAAAGATCT               | <i>NheI</i>                     |
|               | FWA-dNheI     | GCCACTTTTGGTTCCACCAGAACCGGTAGC<br>TA   |                                 |
| <i>SDC</i>    | SDC_asF       | GGTCAAAGCTACCAGAGGAG                   | <i>NcoI</i>                     |
|               | SDC_asR       | GTGTGACGCGAAAGAATGTG                   |                                 |
| <i>FIS2</i>   | FIS2_R5018    | CCTGCATTGTTTGGGAGTGATAGAA              | <i>180 bp deletion in Col-0</i> |
|               | FIS2_F3412    | GGATGATGTAGGAAATCCCCAATTGAGCCC<br>TTTG |                                 |
| <i>MOP9.5</i> | MOP9.5-asF    | TGATGGATCAGGAGGAGCTT                   | <i>BclI</i>                     |
|               | MOP9.5-asR    | GGTGCATGAAGGTGGAATCT                   |                                 |
| <i>MINI3</i>  | MINI3-F2      | GATTCTTCCCAGATTATCCCTC                 | <i>MnII</i>                     |
|               | MINI3-R2      | CATTGTACGGCTGATAAGGA                   |                                 |
| At2g34880     | At2g34880-asF | ATCATTCGGGTTTCAACTGC                   | <i>PvuII</i>                    |
|               | At2g34880-asR | CACGACCAAGAACCCAAGAT                   |                                 |
| At1g61090     | At1g61090F    | CCCGGCTATGAAGTTGGTTA                   | <i>MnII</i>                     |
|               | At1g61090R    | CTGAAAGCCAATTCCCACAT                   |                                 |
| At3g21830     | At3g21830asF  | CGACGAAAAAGATCATGTTGAA                 | <i>MnII</i>                     |
|               | At3g21830asR  | CAGCATTGGTGAGAGCAAAG                   |                                 |
